# Supplementary material for: Incomplete lineage sorting and ancient admixture, and speciation without morphological change in ghost-worm cryptic species
Source: PeerJ journal article supplement (doi:10.7717/peerj.10896), 2021-02-09

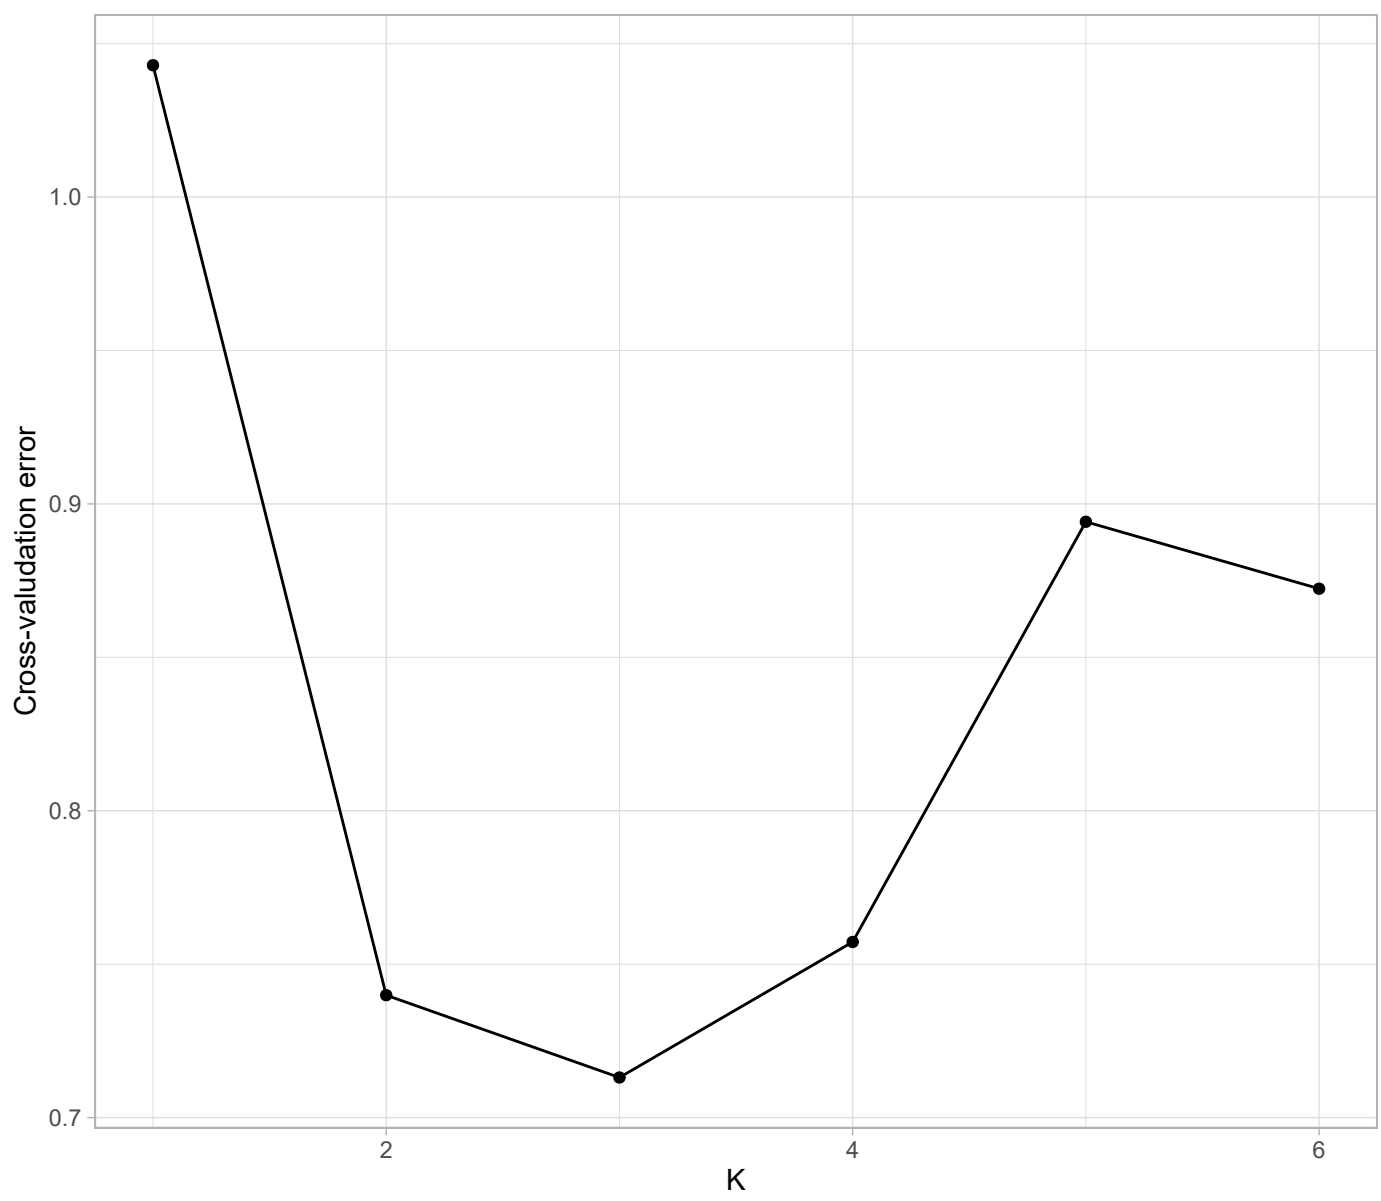

Supplement: Suppl_fig1_cross_validationerror.pdf [file Suppl_fig1_cross_validationerror.pdf]
